# Supplementary material
Source: Springer Nature journal article supplement (https://www.springermedizin.de/resource/supplementary/12916_2006_107_MOESM1_ESM.pdf/9599258)

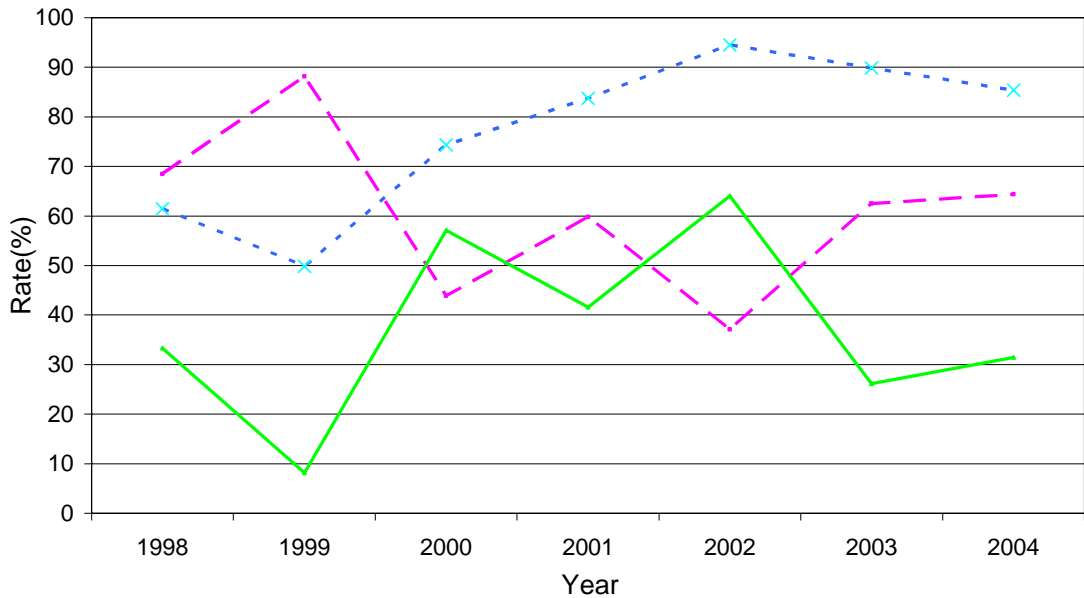

--- Neurologist    — Primary Care Physician    -x- Diagnostic/Screening services

Supplement: MOESM1 [file 9599258]
